# Supplementary material
Source: Research Square preprint supplement (doi:10.21203/rs.3.rs-3226/v2)
Supplement: Supplementary file 1 [file 86acff8d12ec0b1b09b3dfcb.docx]

## Conceptual framework

Several factors play a role in determining the discontinuation of the Implanon. These are socio-demographic variables, gynecological variables, method related factors and others may be inter-related and contribute to Implanon discontinuation as indicated by the conceptual framework below (fig1).

**Service related factors** Place of insertion

Counseling

Previous influence from health provider

Satisfaction by service use Follow up

**Socio- demographic factors**

Age

Marital status

Religion

Educational level

Occupation

Implanon Discontinuation

**Method related factors** Health concerns and side effectsDesire to use another method previous contraceptive use

**Socio-cultural factors** religious oppositionHusband opposition Health information Discussion with spouth/parner

**Fertility related factors**

Number of children Need to have additional child

Abortion Desire to prevent unintended pregnancy

Partner Desire for pregnancy

Fig1: Frame work of Implanon discontinuation among women who used Implanon in Andabet district public health facilities, North-West Ethiopia, 2017.

**Schematic presentation of sampling procedure (fig2)**

Health institutions in Andabet district

Jaragedo HC (382)

Atsede-Mariam HC (214)

Andabet HC (265)

Genete-Mariam HC (189)

Gono HC (226)

544 women

Note: SRS= systematic random sampling method

*Fig2: Schematic presentation of the sampling frame based on the number of women who requested removal of Implanon for three-months prior to the study, Andabet district, public health facilities, North-West Ethiopia, 2017.*

# Results

Figure 3, Reported side effects of the study participants who requested removal of Implanon in Andabet district; Ethiopia: 2017

**Reasons for implanon discontinuation**

From the reason of discontinuation women who discontinue secondary to development of side effect were causes for earlier discontinuation compared to discontinue secondary to want to pregnant, and from the side effects women who were develop headache discontinue earliest, followed by pain at insertion arm (fig3).


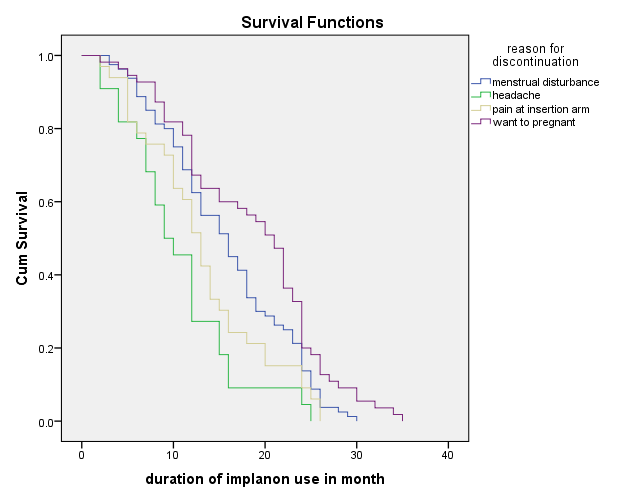


*Fig3: Kaplan Meier survival distribution of the main reasons for implanon discontinuation among women who* requested removal of implanon in Andabet district, public health facilities; North-West Ethiopia: 2017.
